# Supplementary material for: Clinical features of TBK1 carriers compared with C9orf72, GRN and non-mutation carriers in a Belgian cohort
Source: PubMed Central journal article supplement — Brain. 2015 Dec 16;139(2):452–67. doi: 10.1093/brain/awv358 (PMC4805085; doi:10.1093/brain/awv358), 2015-12-16
Supplement: 193de75575a61a3ba6dfc37022be628d_brain-2015-01381-File007.pdf [file 193de75575a61a3ba6dfc37022be628d_brain-2015-01381-File007.pdf]

## Clinical features of *TBK1* carriers compared with *C9orf72*, *GRN* and nonmutation carriers in a Belgian patient cohort.

Van Mossevelde, Sara<sup>abcd</sup>, van der Zee, Julie<sup>ab</sup>, Gijssels, Ilse<sup>ab</sup>, Engelborghs, Sebastiaan<sup>bc</sup>, Sieben, Anne<sup>abe</sup>, Van Langenhove, Tim<sup>abd</sup>, De Bleecker, Jan<sup>e</sup>, Baets, Jonathan<sup>abd</sup>, Vandenbulcke, Mathieu<sup>fg</sup>, Van Laere, Koen<sup>h</sup>, Ceyssens, Sarah<sup>i</sup>, Van den Broeck, Marleen<sup>ab</sup>, Peeters, Karin<sup>ab</sup>, Mattheijssens, Maria<sup>ab</sup>, Cras, Patrick<sup>bd</sup>, Vandenberghe, Rik<sup>fj</sup>, De Jonghe, Peter<sup>abd</sup>, Martin, Jean-Jacques<sup>b</sup>, De Deyn, Peter P.<sup>bc#</sup>, Cruts, Marc<sup>ab</sup>, Van Broeckhoven, Christine<sup>ab\*</sup> on behalf of the Belgian Neurology consortium

<sup>a</sup> Department of Molecular Genetics, VIB, Antwerp, Belgium

<sup>b</sup> Institute Born-Bunge, University of Antwerp, Antwerp, Belgium

<sup>c</sup> Department of Neurology and Memory Clinic, Hospital Network Antwerp (ZNA) Middelheim and Hoge Beuken, Antwerp, Belgium

<sup>d</sup> Department of Neurology, Antwerp University Hospital, Edegem, Belgium

<sup>e</sup> Department of Neurology, University Hospital Ghent and University of Ghent, Ghent, Belgium

<sup>f</sup> Department of Neurosciences, Faculty of Medicine, KU Leuven, Leuven, Belgium

<sup>g</sup> Department of Old Age Psychiatry and Memory Clinic, University Hospitals Leuven, Leuven, Belgium

<sup>h</sup> Department of Nuclear Medicine and Molecular Imaging, KU Leuven, Leuven, Belgium

<sup>i</sup> Molecular Imaging Center Antwerp, Faculty of Medicine and Health Sciences, University of Antwerp, Antwerp, & Department of Nuclear Medicine, Antwerp University Hospital Edegem, Edegem; Belgium

<sup>j</sup> Department of Neurology, University Hospitals Leuven, Leuven, Belgium

<sup>#</sup> Peter P. de Deyn is also affiliated to the Department of Neurology and Alzheimer research Center, University of Groningen and University Medical Center Groningen, Groningen, The Netherlands

**Belgian Neurology (BELNEU) consortium members:** Dirk Nuytten (Hospital Network Antwerp, Antwerp); Katrien Smets (Antwerp University Hospital, Edegem); Wim Robberecht, Philip Van Damme (University Hospitals Leuven Gasthuisberg, Leuven); Patrick Santens, Bart Dermout (University Hospital Ghent, Ghent); Olivier Deryck, Bruno Bergmans (General Hospital Sint-Jan Brugge, Bruges); Jean Delbeck (General Hospital Sint-Maria, Halle); Jan Versijpt, Alex Michotte (University Hospital Brussels, Brussels); Christiana Willems (Jessa Hospital, Hasselt); Adrian Ivanoiu (Saint-Luc University Hospital, Brussels); Eric Salmon (University of Liège and Memory Clinic, CHU Liège, Liège)

### \*Corresponding author:

Prof. Dr. Christine Van Broeckhoven PhD DSc

Neurodegenerative Brain Diseases Group

VIB Department of Molecular Genetics

University of Antwerp - CDE

Universiteitsplein 1, 2610 Antwerp, Belgium

Tel: +32 3 265 1101

E-mail: [christine.vanbroeckhoven@molgen.vib-ua.be](mailto:christine.vanbroeckhoven@molgen.vib-ua.be)

## SUPPLEMENTARY MATERIAL

### Clinical evaluation and technical investigations

Clinical evaluation was performed by the treating neurologist. Neuropsychological testing was performed by a trained and experienced neuropsychologist affiliated with the neurological department where the patient was treated. All the available medical records were reviewed and clinical characteristics were described in a standardized way. Age at onset was defined as the age at which first clinical symptoms were reported by hetero-anamnesis. Disease duration was measured from onset of clinical symptoms until death.

Neuroimaging was performed in the center where the patient was treated.

Interpretation of images was done by the treating neurologist and the radiologist or nuclear radiologist of the center where neuroimaging was performed. The FDG PET images were stereotactically realigned to a normalized FDG template in commercial MIMVISTA software. The voxel values (in Standardized Uptake value (SUV)) were then activity normalized to the mean gray matter value in the brain, and therefore represent relative glucose metabolism. The figures are stereotactic surface projections, with values in (negative) standard deviations from normality (z-scores). The Z maps of the FDG were calculated by comparing the individual glucose metabolic pattern to the normal age-matched control database using MIMVISTA, with a range between 50-80 years. The PET images were not corrected for brain volume loss and therefore reflect the combined effect of volume loss and hypometabolism. However, the particular method of analysis and display in a stereotactic surface projection method with a radial ray tracing approach diminishes any atrophy effects as it takes into consideration the maximum pixel value in a radial line of view, which is not as much influenced by cortical thickness (Burdette *et al.*, 1996). When the images were available, we reviewed them as well.

Cerebrospinal fluid biomarker profiles were analyzed at the Central Laboratory, UZ Leuven or at BIODM, IBB, University of Antwerp, as previously described (Engelborghs *et al.*, 2008).

### Massive parallel sequencing of the coding region of *TBK1*

19 coding exons of *TBK1* were amplified in multiplex PCR reactions using the Multiplex Amplification of Specific Targets for Resequencing (MASTR) (Multiplicom N.V., Niel, Belgium) technology. Primers for multiplexing were designed using the mpcr primer design tool (Multiplicom N.V.). Targets were amplified in highly multiplexed PCR reactions and unique dual indices were added to these amplicons, resulting in up to 1536 uniquely barcoded samples (Lange *et al.*, 2014). After equimolar pooling, the barcoded samples were sequenced on the MiSeq platform using the MiSeq V2 chemistry (250 bp paired-end reads, Illumina, San Diego, CA, USA). After sample demultiplexing, sequence reads were mapped using the Burrows-Wheeler Aligner (BWA) (Li and Durbin, 2010) to a minigenome consisting of the combined amplicon sequences extracted from the human genome reference sequence hg19. Sequence variants were called using the Genome Analysis Toolkit (GATK) (DePristo *et al.*, 2011; McKenna *et al.*, 2010) and SAM (Sequence Alignment/Map) tools (Li *et al.*, 2009) annotated using the GenomeComb variant annotation pipeline (Reumers *et al.*, 2011) and visualized in IGV (Robinson *et al.*, 2011; Thorvaldsdóttir *et al.*, 2013). Exon 4, which failed in this setup, was PCR amplified in simplex followed by Sanger sequencing using the BigDye® Terminator Cycle Sequencing kit v3.1 (Applied Biosystems) on an ABI3730 automated sequencer (Applied

Biosystems). Variants identified in the mutation analysis were validated by PCR-based amplification of genomic DNA followed by Sanger sequencing.

We predicted the pathogenic effect of rare coding variants using two conservation scoring programs SIFT (Sorting Intolerable From Tolerable) (Ng and Henikoff, 2001) and ConSurf (Goldenberg *et al.*, 2009). The effect on stability and dimerization was evaluated in silico by FoldX (Guerois *et al.*, 2002; J. Schymkowitz *et al.*, 2005a; J. Schymkowitz *et al.*, 2005b).

### **Neuropathological and immunohistochemical analysis**

Autopsied brains of two *TBK1* patients DR1124 and DR189 were obtained using informed consents and protocols that were approved by the Ethical Committee of University of Antwerp and Antwerp University Hospital and stored in The Antwerp Biobank of the Institute Born-Bunge. After a fixation period of 8 to 16 weeks in 10% buffered formalin, 5µm slices were cut. Samples were obtained from frontal cortex, temporal neocortex (superior temporal gyrus), hippocampus, area striata, neostriatum, basal ganglia, substantia nigra, thalamus, mesencephalon, pons, medulla oblongata, cerebellum and in addition spinal cord of DR1124. Sections were deparaffinized, rehydrated and pretreated with citric acid 0.1M. Immunohistochemical analysis was performed with anti-ubiquitin antibody (Dako, Glostrup, Denmark), AT8 against hyperphosphorylated tau (Innogenetics, Zwijnaarde, Belgium), 4G8 against β-amyloid (Signet, Dedham, Massachusetts), anti-FUS antibody (Sigma Aldrich, St Louis), anti-TDP-43 antibody (Proteintech Group Inc, Chicago, Illinois). Additionally, immunohistochemistry was performed with anti-p62 antibody (DB Transduction Laboratories). Sections were counterstained with hematoxylin and images were taken on an Axioskop 50 light microscope (Zeiss) equipped with a CCD UC30 camera (Olympus Inc.).

**Supplementary table 1. Demographic characteristics and clinical diagnosis of FTD patients with a *C9orf72* repeat expansion or a *GRN* LOF mutation**

| Patient   | Gender | Clinical diagnosis | Diagnosis subtype | Family history | AAO | DD | Mutation                        |
|-----------|--------|--------------------|-------------------|----------------|-----|----|---------------------------------|
| DR14.5    | M      | FTD                | MXD               | F-AD           | 65  | 7  | <i>C9orf72</i> repeat expansion |
| DR1146.1* | M      | FTD-ALS            | bvFTD             | F-AD           | 55  |    | <i>C9orf72</i> repeat expansion |
| DR710.1*  | F      | FTD-ALS            | bvFTD             | F              | 70  |    | <i>C9orf72</i> repeat expansion |
| DR1195.1* | M      | FTD-ALS            | MXD               | F              | 55  |    | <i>C9orf72</i> repeat expansion |
| DR439.5   | M      | FTD                | bvFTD             | F              | 52  |    | <i>C9orf72</i> repeat expansion |
| DR10.1*   | F      | FTD                | bvFTD             | F-AD           | 54  | 11 | <i>C9orf72</i> repeat expansion |
| DR14.1*   | M      | FTD                | bvFTD             | F-AD           | 56  | 4  | <i>C9orf72</i> repeat expansion |
| DR14.57   | F      | FTD                | bvFTD             | F-AD           |     |    | <i>C9orf72</i> repeat expansion |
| DR29.1*   | F      | FTD                | bvFTD             | F-AD           | 50  | 5  | <i>C9orf72</i> repeat expansion |
| DR29.12   | F      | FTD                | bvFTD             | F-AD           | 64  | 2  | <i>C9orf72</i> repeat expansion |
| DR439.1*  | M      | FTD                | bvFTD             | F              | 54  | 15 | <i>C9orf72</i> repeat expansion |
| DR439.6   | M      | FTD                | bvFTD             | F              | 69  |    | <i>C9orf72</i> repeat expansion |
| DR489.1*  | F      | FTD                | PNFA              | F-AD           | 45  | 7  | <i>C9orf72</i> repeat expansion |
| DR52.1*   | M      | FTD                | bvFTD             | F-AD           | 51  | 7  | <i>C9orf72</i> repeat expansion |
| DR55.1*   | F      | FTD                | bvFTD             | U              | 42  | 6  | <i>C9orf72</i> repeat expansion |
| DR575.1*  | M      | FTD                | bvFTD             | F-AD           | 45  | 6  | <i>C9orf72</i> repeat expansion |
| DR659.1*  | M      | FTD                | bvFTD             | F-AD           | 38  |    | <i>C9orf72</i> repeat expansion |
| DR659.2   | M      | FTD                | SD                | F-AD           | 63  | 11 | <i>C9orf72</i> repeat expansion |
| DR672.1*  | F      | FTD                | bvFTD             | F-AD           | 50  |    | <i>C9orf72</i> repeat expansion |
| DR715.1*  | M      | FTD                | bvFTD             | F-AD           | 52  |    | <i>C9orf72</i> repeat expansion |

|                  |   |     |       |      |    |    |                                 |
|------------------|---|-----|-------|------|----|----|---------------------------------|
| <b>DR715.8</b>   | F | FTD | bvFTD | F-AD | 49 |    | <i>C9orf72</i> repeat expansion |
| <b>DR819.1*</b>  | M | FTD | bvFTD | F    | 49 | 2  | <i>C9orf72</i> repeat expansion |
| <b>DR830.1*</b>  | M | FTD | bvFTD | F-AD | 29 |    | <i>C9orf72</i> repeat expansion |
| <b>DR911.1*</b>  | F | FTD | bvFTD | F-AD | 72 |    | <i>C9orf72</i> repeat expansion |
| <b>DR912.1*</b>  | F | FTD | bvFTD | F-AD | 45 |    | <i>C9orf72</i> repeat expansion |
| <b>DR912.6</b>   | M | FTD | bvFTD | F-AD | 49 |    | <i>C9orf72</i> repeat expansion |
| <b>DR1196.1*</b> | F | FTD | bvFTD | F    | 52 |    | <i>C9orf72</i> repeat expansion |
| <b>DR1053.1*</b> | M | FTD | bvFTD | F    | 55 |    | <i>C9orf72</i> repeat expansion |
| <b>DR212.4</b>   | F | FTD | bvFTD | F    |    |    | <i>C9orf72</i> repeat expansion |
| <b>DR1085.1*</b> | F | FTD | bvFTD | F-AD | 42 | 12 | <i>C9orf72</i> repeat expansion |
| <b>DR1119.1*</b> | F | FTD | bvFTD | S    | 47 | 19 | <i>C9orf72</i> repeat expansion |
| <b>DR1197.1*</b> | F | FTD | bvFTD | F-AD | 35 |    | <i>C9orf72</i> repeat expansion |
| <b>DR1198.1*</b> | M | FTD | bvFTD | F    | 52 |    | <i>C9orf72</i> repeat expansion |
| <b>DR194.1*</b>  | M | FTD | bvFTD | S    | 49 | 18 | <i>C9orf72</i> repeat expansion |
| <b>DR389.1*</b>  | F | FTD | bvFTD | F-AD | 46 |    | <i>C9orf72</i> repeat expansion |
| <b>DR660.1*</b>  | M | FTD | bvFTD | S    | 58 | 8  | <i>C9orf72</i> repeat expansion |
| <b>DR661.1*</b>  | M | FTD | bvFTD | F-AD | 53 |    | <i>C9orf72</i> repeat expansion |
| <b>DR673.1*</b>  | F | FTD | SD    | F-AD | 57 | 7  | <i>C9orf72</i> repeat expansion |
| <b>DR674.1*</b>  | F | FTD |       | U    |    |    | <i>C9orf72</i> repeat expansion |
| <b>DR676.1*</b>  | M | FTD |       | U    |    |    | <i>C9orf72</i> repeat expansion |
| <b>DR677.1*</b>  | M | FTD | bvFTD | F    | 60 | 7  | <i>C9orf72</i> repeat expansion |
| <b>DR678.1*</b>  | M | FTD | SD    | F-AD | 65 | 4  | <i>C9orf72</i> repeat expansion |

|                  |   |         |       |      |    |   |                                 |
|------------------|---|---------|-------|------|----|---|---------------------------------|
| <b>DR680.1*</b>  | F | FTD     |       | F    | 56 |   | <i>C9orf72</i> repeat expansion |
| <b>DR681.1*</b>  | M | FTD-ALS | bvFTD | F    | 50 | 3 | <i>C9orf72</i> repeat expansion |
| <b>DR835.1*</b>  | M | FTD     | bvFTD | F-AD | 54 |   | <i>C9orf72</i> repeat expansion |
| <b>DR1199.1*</b> | M | FTD     | bvFTD | U    | 58 | 3 | <i>C9orf72</i> repeat expansion |
| <b>DR1200.1*</b> | M | FTD     | PNFA  | F-AD | 61 | 2 | <i>C9orf72</i> repeat expansion |
| <b>DR1201.1*</b> | M | FTD     | bvFTD | F-AD | 54 |   | <i>C9orf72</i> repeat expansion |
| <b>DR898.2</b>   | F | FTD     | bvFTD | F    | 61 |   | <i>C9orf72</i> repeat expansion |
| <b>DR679.1*</b>  | M | FTD-ALS | PNFA  | F    | 53 | 2 | <i>C9orf72</i> repeat expansion |
| <b>DR598.4</b>   | M | FTD-ALS | bvFTD | F-AD | 46 |   | <i>C9orf72</i> repeat expansion |
| <b>DR1202.1*</b> | M | FTD     | bvFTD | F    | 54 |   | <i>C9orf72</i> repeat expansion |
| <b>DR52.2</b>    | F | FTD     | bvFTD | F-AD | 75 |   | <i>C9orf72</i> repeat expansion |
| <b>DR393.1*</b>  | F | FTD-ALS | bvFTD | F    | 66 | 3 | <i>C9orf72</i> repeat expansion |
| <b>DR393.2</b>   | M | FTD-ALS | bvFTD | F    | 55 | 1 | <i>C9orf72</i> repeat expansion |
| <b>DR396.1*</b>  | F | FTD-ALS | bvFTD | F-AD | 60 | 2 | <i>C9orf72</i> repeat expansion |
| <b>DR454.1*</b>  | F | FTD-ALS | bvFTD | F-AD | 69 | 2 | <i>C9orf72</i> repeat expansion |
| <b>DR489.4</b>   | M | FTD-ALS | bvFTD | F-AD | 53 | 2 | <i>C9orf72</i> repeat expansion |
| <b>DR598.1*</b>  | F | FTD-ALS | PNFA  | F-AD | 65 | 3 | <i>C9orf72</i> repeat expansion |
| <b>DR1203.1*</b> | F | FTD-ALS | PNFA  | F-AD |    | 1 | <i>C9orf72</i> repeat expansion |
| <b>DR390.1*</b>  | M | FTD-ALS | bvFTD | F    | 49 | 5 | <i>C9orf72</i> repeat expansion |
| <b>DR682.1*</b>  | F | FTD-ALS |       | U    |    |   | <i>C9orf72</i> repeat expansion |
| <b>DR212.1*</b>  | M | FTD     | bvFTD | F    | 68 | 3 | <i>C9orf72</i> repeat expansion |
| <b>DR1204.1*</b> | F | FTD     | bvFTD | F    | 46 |   | <i>C9orf72</i> repeat expansion |

|                  |   |     |       |      |    |   |                                 |
|------------------|---|-----|-------|------|----|---|---------------------------------|
| <b>DR1205.1*</b> | M | FTD | bvFTD | U    |    |   | <i>C9orf72</i> repeat expansion |
| <b>DR2.1*</b>    | M | FTD | bvFTD | F-AD | 67 | 4 | <i>GRN</i> IVS1+5G>C            |
| <b>DR31.1</b>    | M | FTD | PNFA  | F    | 65 | 6 | <i>GRN</i> IVS1+5G>C            |
| <b>DR1206.1</b>  | F | FTD | bvFTD | F    |    |   | <i>GRN</i> IVS1+5G>C            |
| <b>DR1207.1</b>  | F | FTD | PNFA  | S    | 62 | 4 | <i>GRN</i> IVS1+5G>C            |
| <b>DR1208.1</b>  | F | FTD | PNFA  | S    | 63 |   | <i>GRN</i> IVS1+5G>C            |
| <b>DR686.1</b>   | F | FTD |       | U    |    |   | <i>GRN</i> IVS1+5G>C            |
| <b>DR27.1</b>    | F | FTD | bvFTD | F-AD | 58 | 4 | <i>GRN</i> IVS1+5G>C            |
| <b>DR8.2</b>     | M | FTD |       | U    |    |   | <i>GRN</i> IVS1+5G>C            |
| <b>DR25.1</b>    | F | FTD | bvFTD | F-AD | 69 | 5 | <i>GRN</i> IVS1+5G>C            |
| <b>DR1209.1</b>  | M | FTD | PNFA  | S    | 60 |   | <i>GRN</i> IVS1+5G>C            |
| <b>DR1210.1</b>  | M | FTD | bvFTD | S    | 70 |   | <i>GRN</i> IVS1+5G>C            |
| <b>DR2.17</b>    | M | FTD | MXD   | F-AD | 69 |   | <i>GRN</i> IVS1+5G>C            |
| <b>DR2.18</b>    | M | FTD | bvFTD | F-AD | 70 |   | <i>GRN</i> IVS1+5G>C            |
| <b>DR792.1</b>   | F | FTD | PNFA  | U    | 69 |   | <i>GRN</i> IVS1+5G>C            |
| <b>DR8.15</b>    | F | FTD | PNFA  | F-AD | 61 | 3 | <i>GRN</i> IVS1+5G>C            |
| <b>DR1211.1</b>  | M | FTD |       | U    | 56 |   | <i>GRN</i> IVS1+5G>C            |
| <b>DR1212.1</b>  | F | FTD | PNFA  | U    | 63 | 5 | <i>GRN</i> IVS1+5G>C            |
| <b>DR1213.1</b>  | M | FTD |       | U    | 58 | 2 | <i>GRN</i> IVS1+5G>C            |
| <b>DR1194.1</b>  | F | FTD | PNFA  | F-AD | 62 |   | <i>GRN</i> IVS1+5G>C            |
| <b>DR1214.1</b>  | M | FTD |       | U    |    |   | <i>GRN</i> IVS1+5G>C            |
| <b>DR28.1</b>    | M | FTD | PNFA  | F-AD | 56 | 6 | <i>GRN</i> IVS1+5G>C            |

|                  |   |     |       |      |    |   |                              |
|------------------|---|-----|-------|------|----|---|------------------------------|
| <b>DR8.1</b>     | F | FTD | bvFTD | F-AD | 62 | 6 | <i>GRN</i> IVS1+5G>C         |
| <b>DR2.3</b>     | F | FTD | PNFA  | F-AD | 63 | 8 | <i>GRN</i> IVS1+5G>C         |
| <b>DR2.15</b>    | F | FTD | MXD   | F-AD | 68 | 5 | <i>GRN</i> IVS1+5G>C         |
| <b>DR26.1</b>    | M | FTD | PNFA  | F    | 65 | 3 | <i>GRN</i> IVS1+5G>C         |
| <b>DR404.1</b>   | F | FTD | SD    | F    | 55 | 7 | <i>GRN</i> IVS1+5G>C         |
| <b>DR25.5</b>    | M | FTD | bvFTD | F-AD | 70 | 3 | <i>GRN</i> IVS1+5G>C         |
| <b>DR119.1</b>   | F | FTD | PNFA  | F    | 45 | 5 | <i>GRN</i> IVS1+5G>C         |
| <b>DR28.3</b>    | M | FTD | bvFTD | F-AD | 46 |   | <i>GRN</i> IVS1+5G>C         |
| <b>DR8.40</b>    | F | FTD | bvFTD | F-AD | 52 | 4 | <i>GRN</i> IVS1+5G>C         |
| <b>DR8.42</b>    | M | FTD | bvFTD | F-AD | 62 | 7 | <i>GRN</i> IVS1+5G>C         |
| <b>DR91.1*</b>   | F | FTD | bvFTD | U    | 66 | 6 | <i>GRN</i> Ala237TrpfsX4     |
| <b>DR184.1*</b>  | F | FTD | SD    | S    | 70 | 4 | <i>GRN</i> del               |
| <b>DR118.1</b>   | F | FTD | bvFTD | F    | 63 | 8 | <i>GRN</i> Met1Ile           |
| <b>DR609.1*</b>  | M | FTD | bvFTD | F    | 52 | 9 | <i>GRN</i> Glu498X           |
| <b>DR120.1*</b>  | F | FTD | PNFA  | F-AD | 55 |   | <i>GRN</i> Pro127ArgfsX2     |
| <b>DR403.1*</b>  | M | FTD | PNFA  | F    | 53 | 7 | <i>GRN</i> Val279GlyfsX5     |
| <b>DR510.1*</b>  | F | FTD |       | U    |    |   | <i>GRN</i><br>Asn118PhefsX4  |
| <b>DR698.1*</b>  | M | FTD | SD    | F    | 57 |   | <i>GRN</i> Ala237TrpfsX4     |
| <b>DR554.1*</b>  | F | FTD | bvFTD | F    | 56 |   | <i>GRN</i> Trp304X           |
| <b>DR1215.1*</b> | F | FTD |       | U    |    |   | <i>GRN</i> Pro127ArgfsX2     |
| <b>DR287.1*</b>  | F | FTD | PNFA  | F    | 65 | 6 | <i>GRN</i> Ala89ValfsX41     |
| <b>DR529.1*</b>  | M | FTD | bvFTD | F    |    |   | <i>GRN</i><br>Ala303GlyfsX14 |

|                  |   |     |       |      |    |    |                                |
|------------------|---|-----|-------|------|----|----|--------------------------------|
| <b>DR701.1*</b>  | F | FTD | PNFA  | F    | 53 |    | <i>GRN</i><br>Ala303GlyfsX14   |
| <b>DR1216.1*</b> | M | FTD | bvFTD | F    |    |    | <i>GRN</i> Tyr294*<br>c.882T>G |
| <b>DR1084.1*</b> | F | FTD | bvFTD | F-AD | 58 |    | <i>GRN</i> Ala237Trpfs*4       |
| <b>DR1103.1*</b> | M | FTD | bvFTD | F-AD | 58 |    | <i>GRN</i> Met1?               |
| <b>DR1217.1*</b> | M | FTD |       | U    |    |    | <i>GRN</i><br>Trp304CysfsX58   |
| <b>DR1218.1*</b> | F | FTD |       | U    |    |    | <i>GRN</i><br>Ala303Profs*58   |
| <b>DR1219.1*</b> | F | FTD |       | U    |    |    | <i>GRN</i><br>Ala303Profs*58   |
| <b>DR1220.1*</b> | M | FTD | MXD   | F    | 62 |    | <i>GRN</i> Thr330Alafs*6       |
| <b>DR737.1*</b>  | F | FTD | SD    | F    | 68 | 11 | <i>GRN</i> Gln249ProfsX6       |

Abbreviations: \*Indexpatient; ALS, amyotrophic lateral sclerosis; bvFTD, behavioral variant frontotemporal dementia; F (gender), female; F (familial history), familial; F-AD, familial with autosomal dominant pattern; FTD, frontotemporal dementia; M, male; MXD, mixed frontotemporal dementia (behavioral as well as language features); PNFA, progressive nonfluent aphasia; S, sporadic; SD, semantic dementia; U, unknown

## REFERENCES

- Burdette JH, Minoshima S, Vander Borgh T, Tran DD, Kuhl DE. Alzheimer disease: improved visual interpretation of PET images by using three-dimensional stereotaxic surface projections. *Radiology* 1996; 198: 837–843.
- DePristo MA, Banks E, Poplin RE, Garimella KV, Maguire JR, Hartl C, *et al.* A framework for variation discovery and genotyping using next- generation DNA sequencing data. *Nat Genet* 2011; 43: 491–498.
- Engelborghs S, De Vreese K, Van de Castele T, Vanderstichele H, Van Everbroeck B, Cras P, *et al.* Diagnostic performance of a CSF-biomarker panel in autopsy-confirmed dementia. *Neurobiol Aging* 2008; 29: 1143–1159.
- Goldenberg O, Erez E, Nimrod G, Ben-Tal N. The ConSurf-DB: Pre-calculated evolutionary conservation profiles of protein structures. *Nucleic Acids Res* 2009; 37: 323–327.
- Guerois R, Nielsen JE, Serrano L. Predicting changes in the stability of proteins and protein complexes: A study of more than 1000 mutations. *J Mol Biol* 2002; 320: 369–387.
- Lange V, Böhme I, Hofmann J, Lang K, Sauter J, Schöne B, *et al.* Cost-efficient high-throughput HLA typing by MiSeq amplicon sequencing. *BMC Genomics* 2014; 15: 63.
- Li H, Handsaker B, Wysoker A, Fennell T, Ruan J, Homer N, *et al.* The Sequence Alignment/Map format and SAMtools. *Bioinformatics* 2009; 25: 2078–2079.
- Li H, Durbin R. Fast and accurate long-read alignment with Burrows-Wheeler transform. *Bioinformatics* 2010; 26: 589–595.
- McKenna A, Hanna M, Banks E, Sivachenko A, Cibulskis K, Kernysky A, *et al.* The genome analysis toolkit: A MapReduce framework for analyzing next-generation DNA sequencing data. *Genome Res* 2010; 20: 1297–1303.
- Ng PC, Henikoff S. Predicting deleterious amino acid substitutions. *Genome Res* 2001; 11: 863–874.
- Reumers J, De Rijk P, Zhao H, Liekens A, Smeets D, Cleary J, *et al.* Optimized filtering reduces the error rate in detecting genomic variants by short-read sequencing. *Nat Biotechnol* 2011; 30: 61–68.
- Robinson JT, Thorvaldsdóttir H, Winckler W, Guttman M, Lander ES, Getz G, *et al.* Integrative genomics viewer. *Nat Biotechnol* 2011; 29: 24–26.
- Schymkowitz J, Borg J, Stricher F, Nys R, Rousseau F, Serrano L. The FoldX web server: An online force field. *Nucleic Acids Res* 2005a; 33: 382–388.
- Schymkowitz J, Rousseau F, Martins IC, Ferkinghoff-Borg J, Stricher F, Serrano L. Prediction of water and metal binding sites and their affinities by using the Fold-X force field. *Proc Natl Acad Sci U. S. A.* 2005b; 102: 10147–10152.
- Thorvaldsdóttir H, Robinson JT, Mesirov JP. Integrative Genomics Viewer (IGV): High-performance genomics data visualization and exploration. *Brief. Bioinform.* 2013; 14: 178–192.
